# Supplementary material for: The enhancement of Hall mobility and conductivity of CVD graphene through radical doping and vacuum annealing
Source: Royal Society of Chemistry journal article supplement (doi:10.1039/c7ra01330b), 2017-01-01
Supplement: c7ra01330b1.pdf [file c7ra01330b1.pdf]

## Electronic Supplementary Material

### **Enhancement of Hall mobility and conductivity of CVD graphene through radical doping and vacuum annealing**

**Viet Phuong Pham,<sup>\*ab</sup> Anurag Mishra,<sup>ac</sup> Geun Young Yeom,<sup>\*ab</sup>**

<sup>a</sup> School of Advanced Materials Science and Engineering, Sungkyunkwan University (SKKU),  
Suwon, Gyeonggi-do 440-746, Republic of Korea

<sup>b</sup> SKKU Advanced Institute of Nano Technology (SAINT), SKKU, Suwon, Gyeonggi-do 440-746,  
Republic of Korea

<sup>c</sup> Etch Division, Applied Materials Co., Sunnyvale, California, 94085, USA

\*Email: [pvphuong1985@gmail.com](mailto:pvphuong1985@gmail.com) and [gyyeom@skku.edu](mailto:gyyeom@skku.edu)

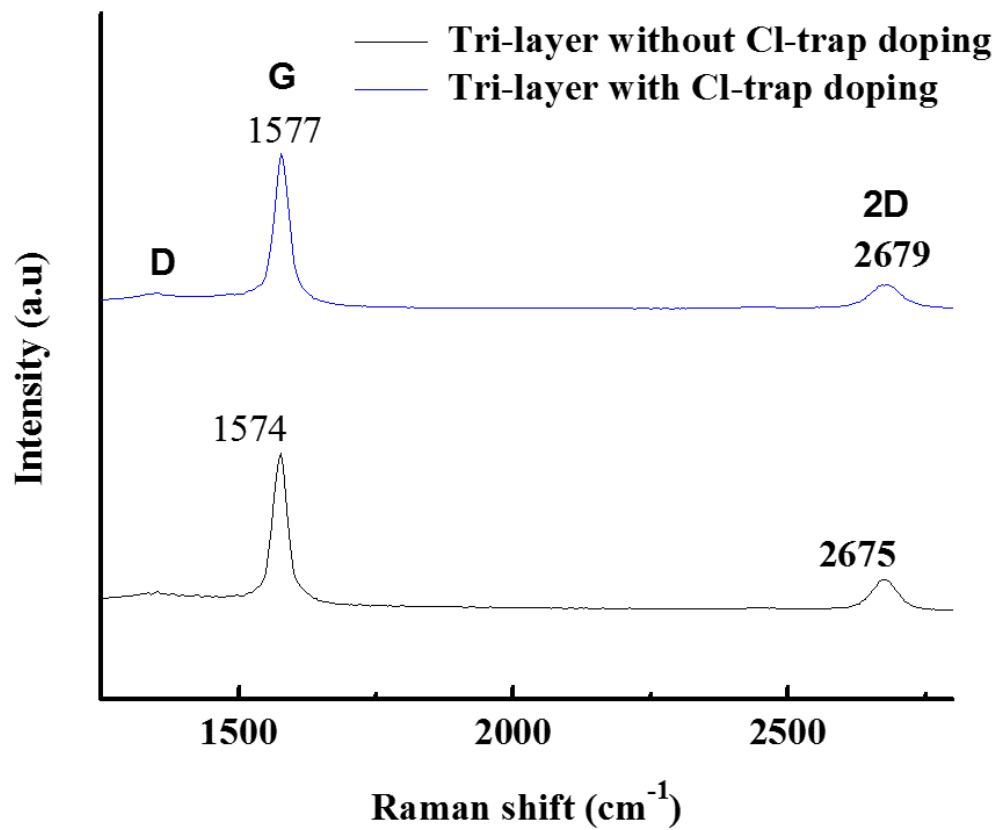

Fig S1. Raman spectra of tri-layer graphene with/without p-type Cl-trap doping.

With Cl-trap doping, tri-layer graphene showed the blue shift of G and 2D peaks, indicating the Cl dopant as a p-type doping on graphene.
